# Supplementary material
Source: publisher site journal article supplement (https://en-cdn.bio-protocol.org/attached/file/20171120/Supplementary%20Table%201.docx)
Supplement: Supplementary file 1 [file Supplementary%20Table%201.docx]

**Table S1. List of species from which we obtained the leaf epidermis images**

| **Species** | **Family** |
| --- | --- |
| *Baccharis linearifolia* (Lam.) Pers. | Asteraceae |
| *Byrsonima laxiflora* Griseb. | Malpighiaceae |
| *Calophyllum brasiliense* Cambess. | Clusiaceae |
| *Campomanesia velutina* (Cambess.) O. Berg | Myrtaceae |
| *Clusia criuva* Cambess. | Clusiaceae |
| *Copaifera langsdorffii* Desf. | Fabaceae |
| *Cupania vernalis* Cambess. | Sapindaceae |
| *Duguetia furfuracea* (A.St.-Hill.) Saff. | Annonaceae |
| *Eriotheca candolleana* (K. Schum.) A. Robyns | Malvaceae |
| *Esenbeckia pumila* Pohl. | Rutaceae |
| *Gaylussacia brasiliensis* (Spreng.) Meisn. | Ericaceae |
| *Guapira noxia* (Netto) Lundell | Nyctaginaceae |
| *Handroanthus impetiginosus* (Mart. ex DC.) Mattos | Bignoniaceae |
| *Hymenaea stigonocarpa* Mart. ex Hayne | Fabaceae |
| *Ilex affinis* Gardner | Aquifoliaceae |
| *Matayba guianensis* Aubl. | Sapindaceae |
| *Maytenus floribunda* Reissek | Celastraceae |
| *Miconia cuspidata* Naudin | Melastomataceae |
| *Miconia chamissois* Naudin | Melastomataceae |
| *Myrsine guianensis* (Aubl.) Kuntze | Myrsinaceae |
| *Myrsine ferruginea* (Ruiz & Pav.) Spreng. | Myrsinaceae |
| *Ouratea hexasperma* (A.St.-Hill.) Baill. | Ochnaceae |
| *Plenckia populnea* Reissek | Celastraceae |
| *Pseudobombax longiflorum* (Mart. & Zucc.) A.Robyns | Malvaceae |
| *Roupala montana* Aubl. | Proteaceae |
| *Rourea induta* Planch. | Connaraceae |
| *Salacia crassifolia* (Mart. ex Schult.) G. Don | Celastraceae |
| *Symplocos mosenii* Brand | Symplocaceae |
| *Symplocos nitens* (Pohl) Benth. | Symplocaceae |
| *Tapirira guianensis* Aubl. | Anacardiaceae |
| *Virola sebifera* Aubl. | Myristicaceae |
| *Xylopia sericea* A.St.-Hil. | Annonaceae |
